# Supplementary material for: Optimization of Coffee Oil Extraction from Defective Beans Using a Supercritical Carbon Dioxide Technique: Its Effect on Volatile Aroma Components
Source: MDPI journal article supplement (doi:10.3390/foods12132515), 2023-06-28
Supplement: s1 [file s1]

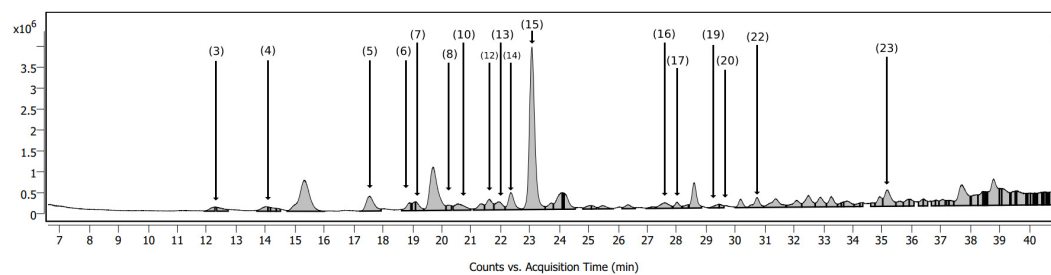

**Figure S1.** Chromatograms of volatile aroma compounds of coffee oil obtained using the DSE method. Peak numbers correspond to those of Table 9.
